# Supplementary material for: Communicating with Patients about COVID-19 Vaccination: A Qualitative Study on Vaccinators in Tuscany Region, Italy
Source: MDPI journal article supplement (doi:10.3390/vaccines11020223), 2023-01-19
Supplement: s1 [file s1]

## Supplementary materials

**Table S1.** Characteristics of the vaccinators at individual level

| Vaccinator | Age (years) | Sex    | Number of patients | Average number of vaccinations administered | Previous experience with other vaccination campaign | Urbanization level | Type of vaccinators |
|------------|-------------|--------|--------------------|---------------------------------------------|-----------------------------------------------------|--------------------|---------------------|
| 1          | 29          | Male   | NA                 | 5,000- 10,000                               | NO                                                  | Suburban/<br>rural | HUB                 |
| 2          | 29          | Male   | NA                 | 2,000-5,000                                 | NO                                                  | Urban              | HUB                 |
| 3          | 29          | Male   | NA                 | 2,000-5,000                                 | NO                                                  | Suburban/<br>rural | HUB                 |
| 4          | 29          | Male   | NA                 | 1,000-2,000                                 | NO                                                  | Urban              | HUB                 |
| 5          | 67          | Male   | NA                 | >10,000                                     | YES                                                 | Suburban/<br>rural | HUB                 |
| 6          | 69          | Male   | NA                 | >10,000                                     | YES                                                 | Suburban/<br>rural | HUB                 |
| 7          | 31          | Female | NA                 | >10,000                                     | NO                                                  | Urban              | Hospital            |
| 8          | 71          | Male   | NA                 | 5,000- 10,000                               | YES                                                 | Suburban/<br>rural | HUB                 |
| 9          | 32          | Male   | NA                 | 1,000-2,000                                 | NO                                                  | Urban              | Hospital and<br>HUB |
| 10         | 31          | Female | NA                 | 2,000-5,000                                 | NO                                                  | Suburban/<br>rural | HUB                 |
| 11         | 31          | Female | NA                 | 2,000-5,000                                 | NO                                                  | Suburban/<br>rural | HUB                 |
| 12         | 29          | Male   | NA                 | 2,000-5,000                                 | YES                                                 | Urban              | USCA                |
| 13         | 44          | Female | NA                 | 5,000- 10,000                               | NO                                                  | Urban              | USCA                |
| 14         | 28          | Female | NA                 | 1,000-2,000                                 | NO                                                  | Urban              | USCA                |

|    |    |        |       |               |     |                    |                                      |
|----|----|--------|-------|---------------|-----|--------------------|--------------------------------------|
| 15 | 25 | Female | NA    | 5,000- 10,000 | NO  | Suburban/<br>rural | HUB                                  |
| 16 | 55 | Male   | NA    | 2,000-5,000   | YES | Urban              | HUB                                  |
| 17 | 36 | Male   | 1,600 | 1,000-2,000   | YES | Suburban/<br>rural | general<br>practitioners             |
| 18 | 39 | Male   | 1,678 | 1,000-2,000   | YES | Suburban/<br>rural | general<br>practitioners             |
| 19 | 36 | Male   | 1,560 | 1,000-2,000   | YES | Suburban/<br>rural | general<br>practitioners<br>and USCA |
| 20 | 34 | Female | 1,260 | 1,000-2,000   | YES | Suburban/<br>rural | general<br>practitioners             |
| 21 | 36 | Female | 1,450 | 1,000-2,000   | YES | Suburban/<br>rural | general<br>practitioners             |
| 22 | 43 | Female | 1,440 | 1,000-2,000   | YES | Suburban/<br>rural | general<br>practitioners             |
| 23 | 57 | Male   | 1,574 | 1,000-2,000   | YES | Suburban/<br>rural | general<br>practitioners             |
| 24 | 69 | Female | 1,580 | 1,000-2,000   | YES | Suburban/<br>rural | general<br>practitioners             |
| 25 | 44 | Male   | NA    | 1,000-2,000   | YES | Urban              | USCA                                 |
| 26 | 65 | Female | NA    | 1,000-2,000   | YES | Urban              | Hospital                             |
| 27 | 38 | Female | 1,267 | 1,000-2,000   | YES | Suburban/<br>rural | general<br>practitioners             |
| 28 | 39 | Female | 1,200 | 1,000-2,000   | YES | Suburban/<br>rural | general<br>practitioners             |
| 29 | 44 | Female | 1,500 | 1,000-2,000   | YES | Suburban/<br>rural | general<br>practitioners             |
| 30 | 39 | Male   | 760   | 1,000-2,000   | YES | Suburban/<br>rural | general<br>practitioners<br>and USCA |
